# Supplementary figures and images for: A projectome of the bumblebee central complex
Source: eLife journal article supplement (doi:10.7554/elife.68911), 2021-09-15

**a**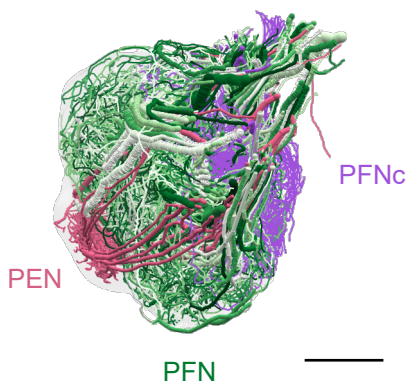**b**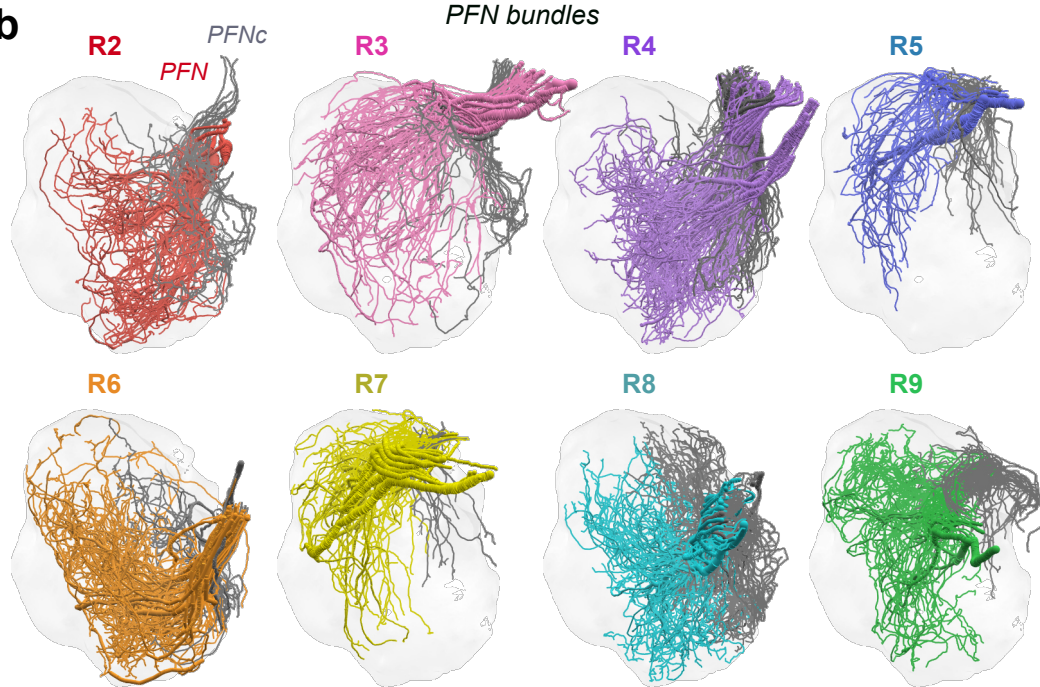**c**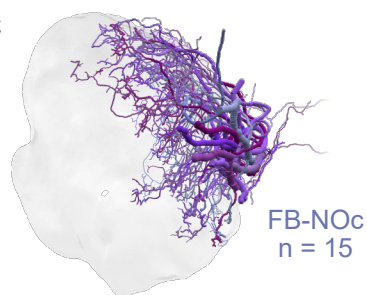**e**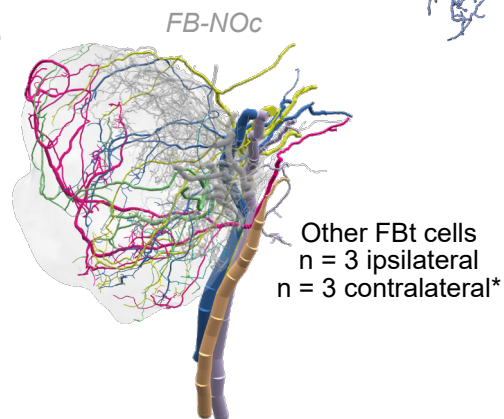**d**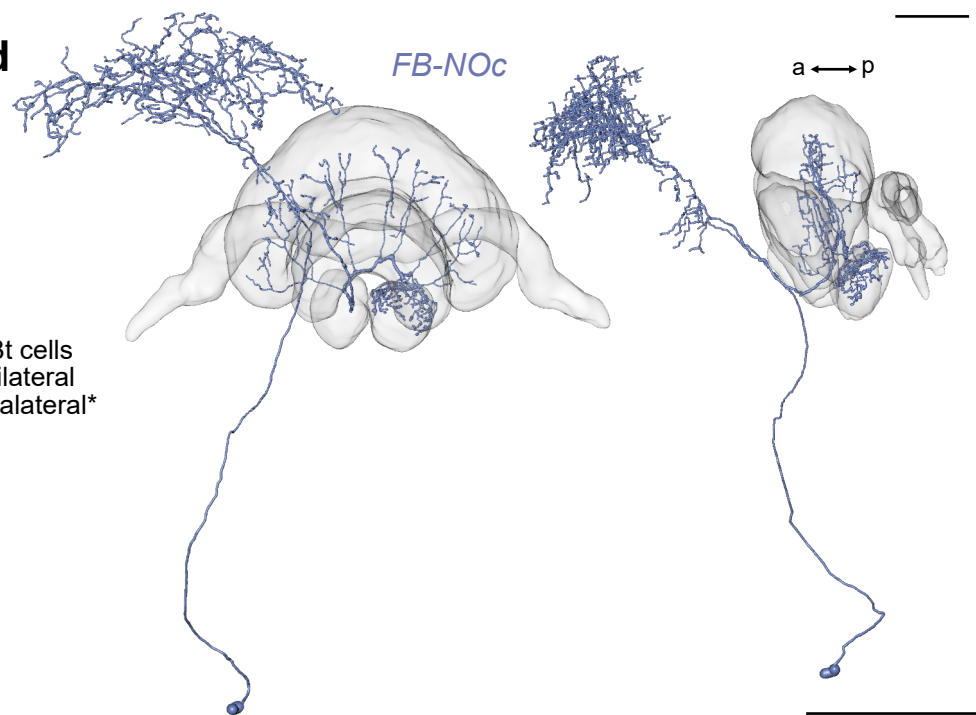

Supplement: supp [file elife-68911-supp-v1.zip]

## EPG/PEG

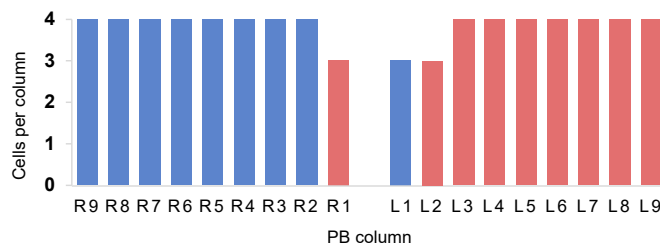

## PEN

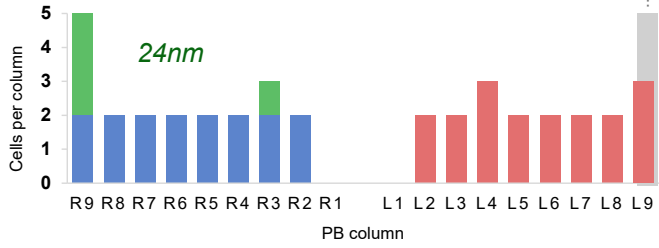

## PFLx

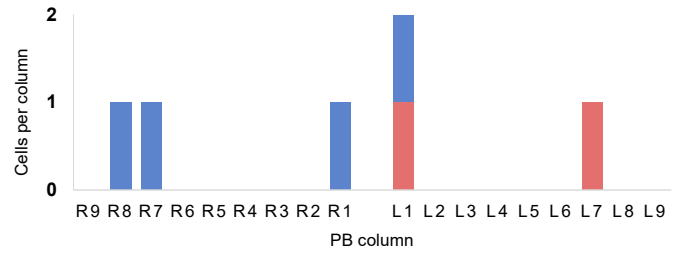

## PFN

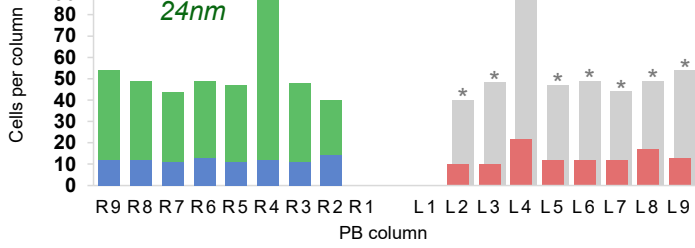

## PFx1

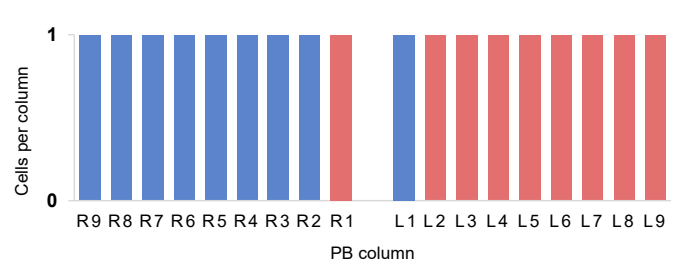

## PFL1,3

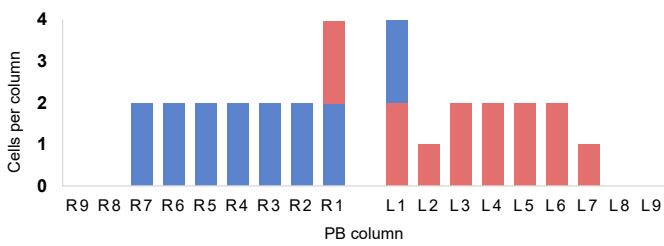

## PFx2

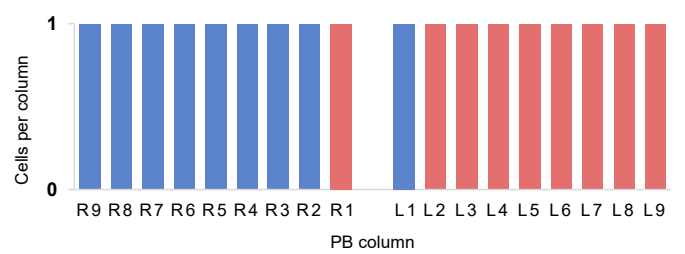

## PFL2

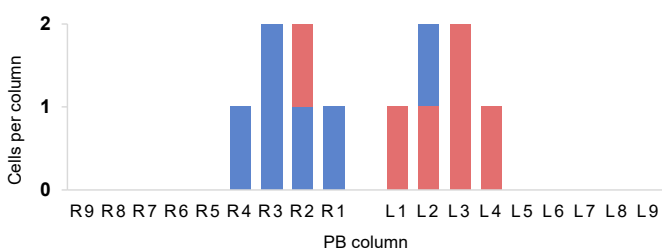

## PFx3

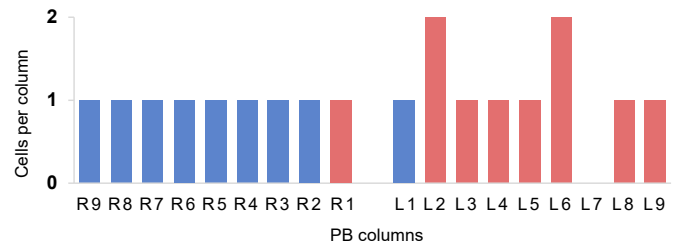

## PF1

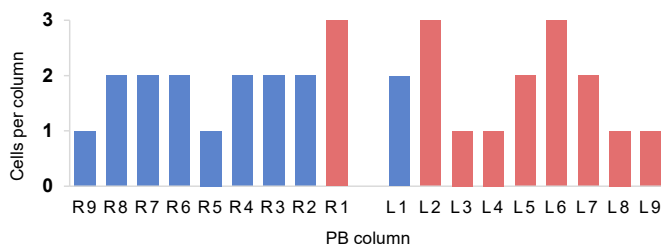

## PFx4

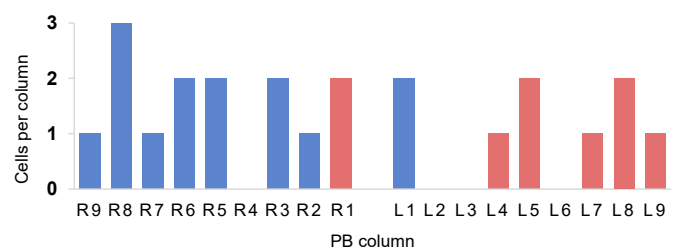

Supplement: supp [file elife-68911-supp-v1.zip]

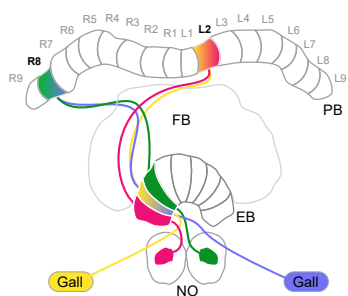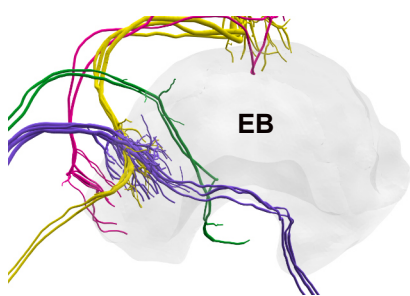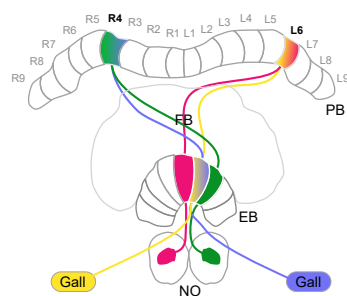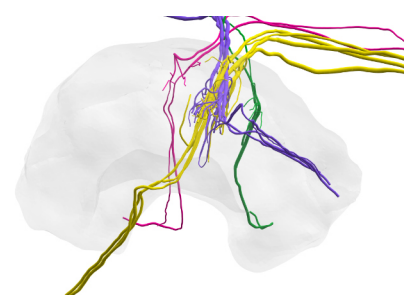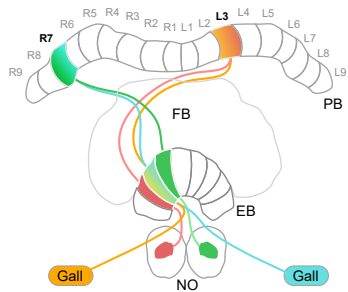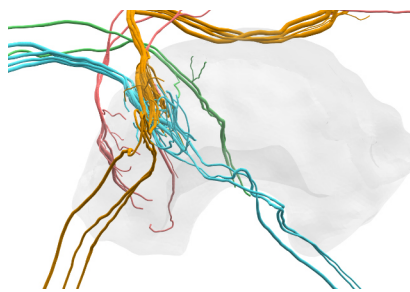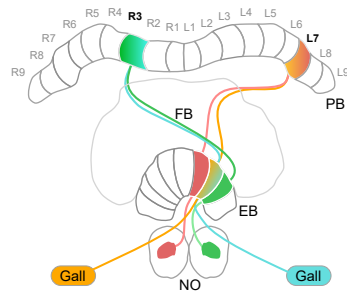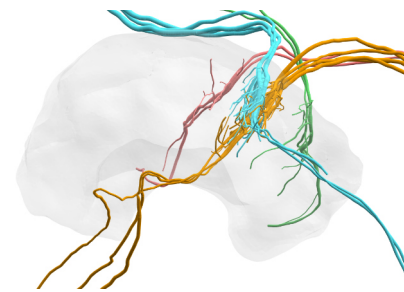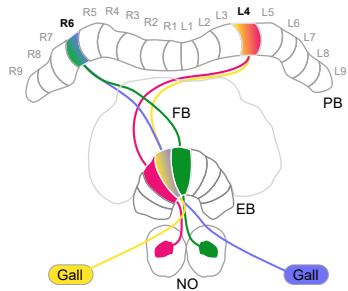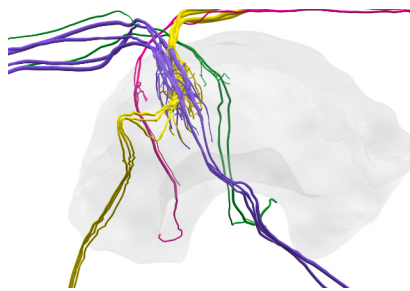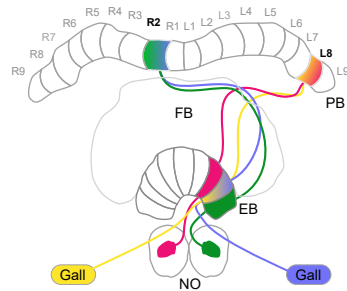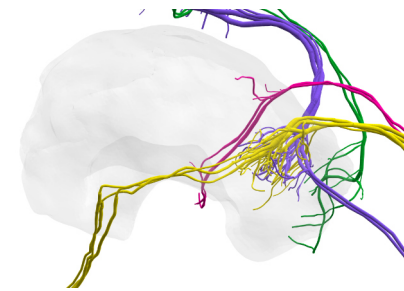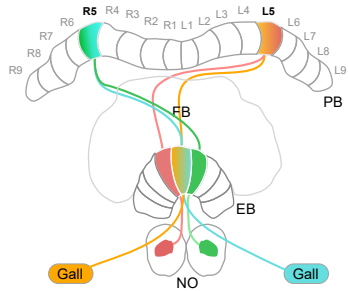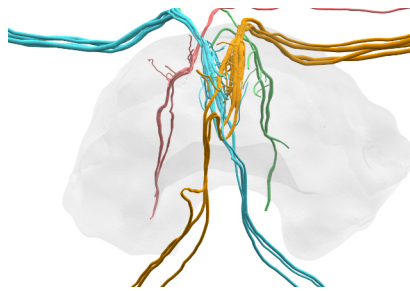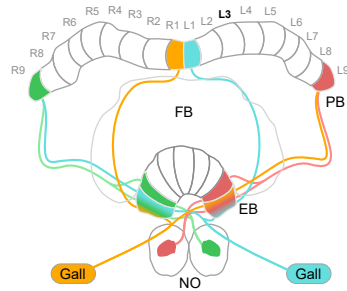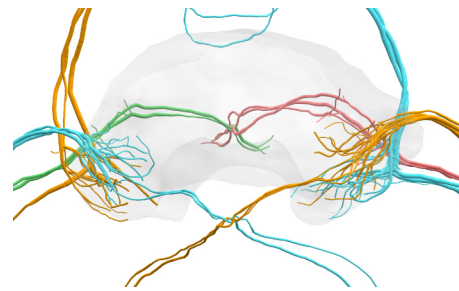

Supplement: supp [file elife-68911-supp-v1.zip]

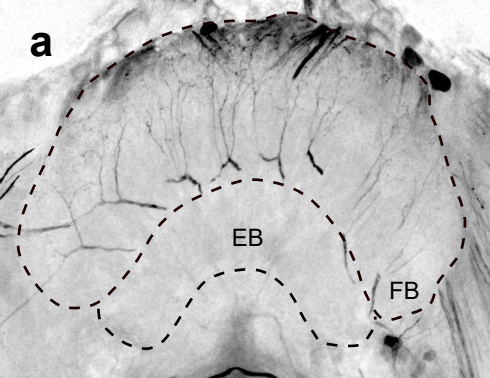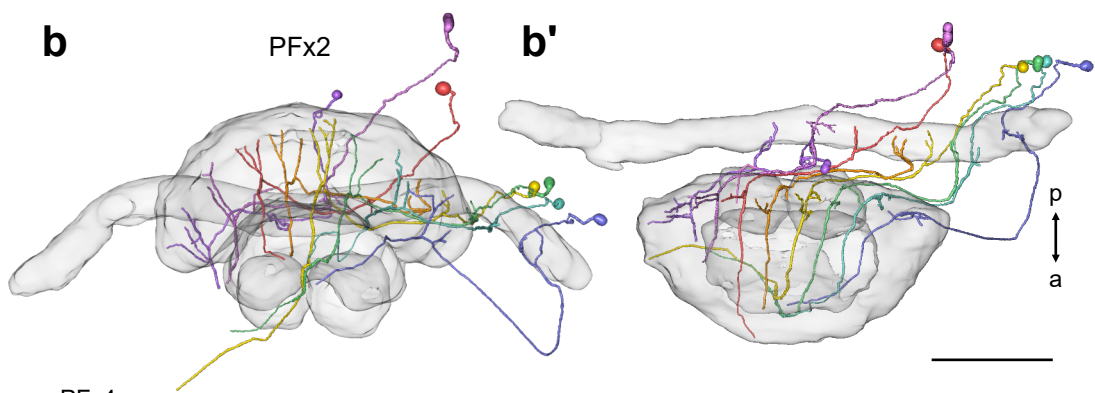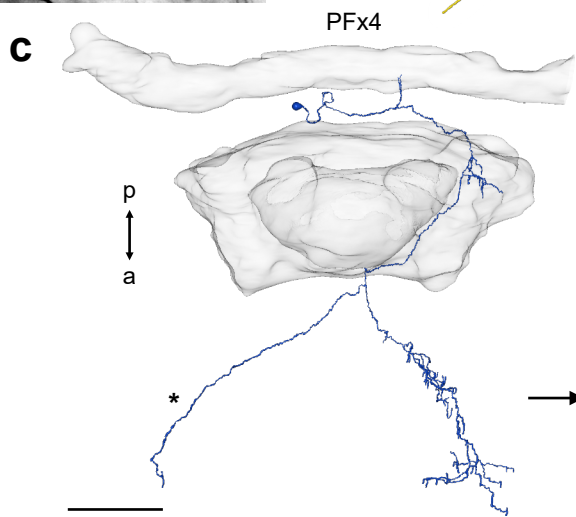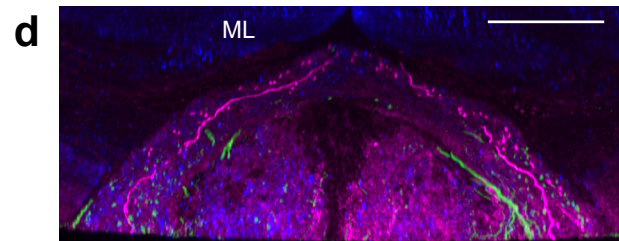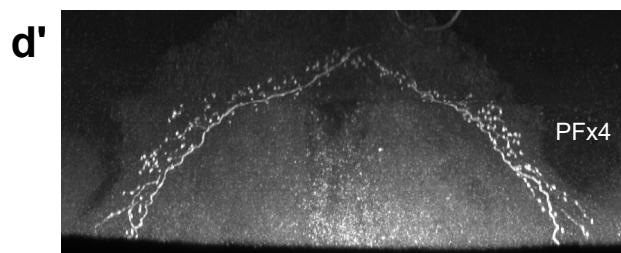

Supplement: supp [file elife-68911-supp-v1.zip]

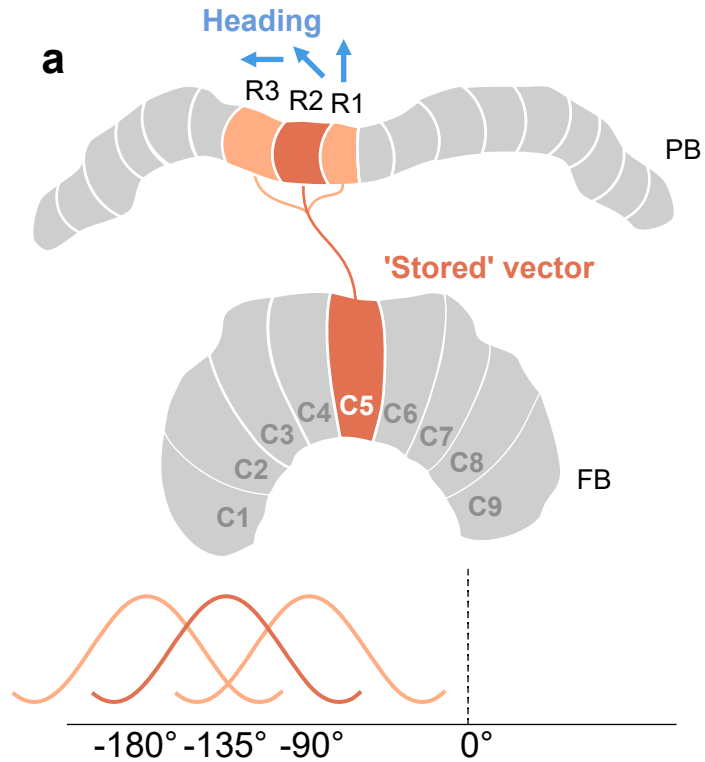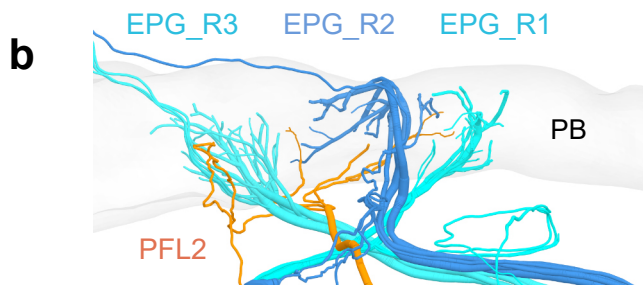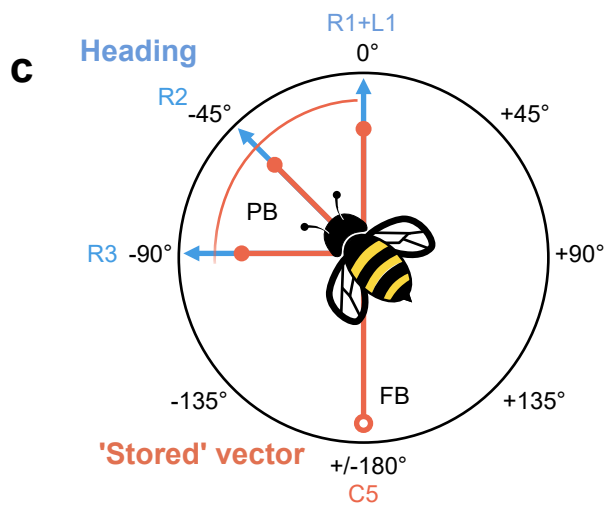

Supplement: supp [file elife-68911-supp-v1.zip]

**A***PEG/EPG*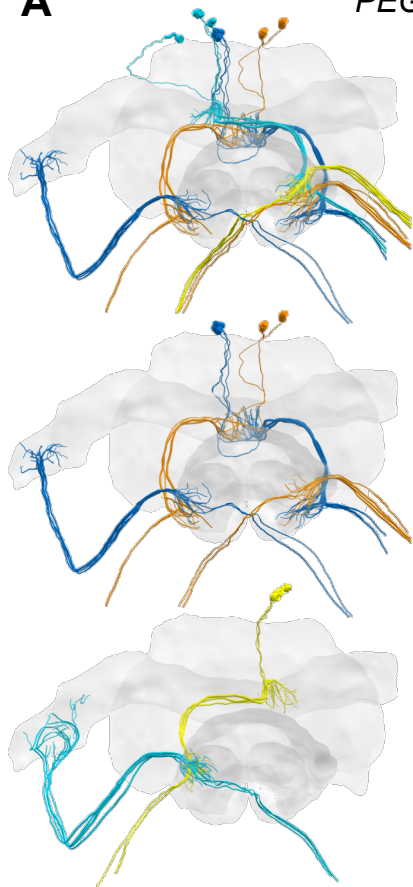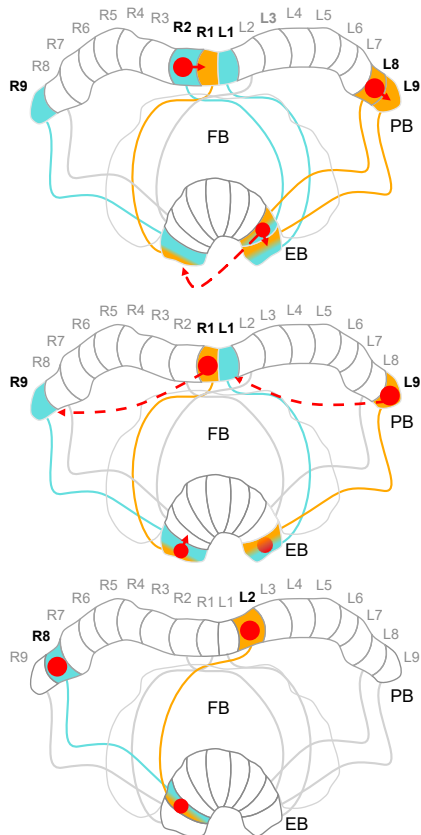

Supplement: supp [file elife-68911-supp-v1.zip]
